# Supplementary material for: Pulsed Electrical Stimulation of the Human Eye Enhances Retinal Vessel Reaction to Flickering Light
Source: PubMed Central journal article supplement (PMC6817672; doi:10.3389/fnhum.2019.00371), 2019-10-22
Supplement: Table_1.pdf [file Table_1.pdf]

**Supplementary Table S1.** Retinal vasodilation values of the individual subjects of the 400  $\mu$ A group after provocation with stimulus conditions FLS and ES+FLS.

| Subject | FLS |      |     |     | ES+FLS |      |      |      |
|---------|-----|------|-----|-----|--------|------|------|------|
|         | sTA | iTA  | sTV | iTV | sTA    | iTA  | sTV  | iTV  |
| s_01    | 0.0 | 2.2  | 4.7 | -   | 3.0    | 2.7  | 8.7  | -    |
| s_02    | 4.8 | -    | -   | -   | 4.5    | -    | -    | -    |
| s_03    | 3.0 | 6.1  | -   | 7.9 | 1.5    | 8.0  | -    | 6.2  |
| s_04    | 2.3 | 0.8  | 6.2 | 5.1 | 2.9    | 3.0  | 4.6  | 7.0  |
| s_05    | 0.5 | 3.9  | 7.5 | 2.7 | 1.4    | 3.2  | 9.4  | 3.3  |
| s_06    | 4.1 | 0.9  | 6.7 | -   | 3.6    | 4.8  | 9.1  | -    |
| s_07    | 8.6 | 10.3 | 5.3 | 5.2 | 8.8    | 13.1 | 5.5  | 5.8  |
| s_08    | 7.8 | -    | -   | -   | 7.3    | -    | -    | -    |
| s_09    | -   | -    | 4.2 | 0.5 | -      | -    | 4.2  | 3.8  |
| s_10    | 1.0 | -    | 5.0 | 3.3 | 2.3    | -    | 9.2  | 5.5  |
| s_11    | 4.3 | 5.5  | 9.5 | 8.7 | 2.4    | 3.8  | 6.9  | 6.2  |
| s_12    | 3.0 | -    | 4.0 | 3.2 | 0.4    | -    | 6.0  | 4.6  |
| s_13    | 3.5 | 5.3  | -   | 4.0 | 6.2    | 8.4  | -    | 5.4  |
| s_14    | 2.3 | -    | -   | 5.2 | 2.6    | -    | -    | 4.0  |
| s_15    | -   | 2.2  | 6.5 | -   | -      | 4.4  | 8.8  | -    |
| s_16    | 3.4 | 4.6  | 3.0 | 3.9 | 6.0    | 9.1  | 5.0  | 6.2  |
| s_17    | 1.4 | 2.0  | 2.7 | 3.3 | 5.7    | 4.4  | 4.5  | 7.3  |
| s_18    | 5.6 | 4.9  | 5.7 | 2.2 | 4.1    | 3.4  | 3.7  | 2.9  |
| s_19    | 5.4 | 1.7  | 5.0 | 5.0 | 0.8    | 1.2  | 4.1  | 2.2  |
| s_20    | 5.2 | 4.4  | 9.9 | 9.0 | 7.1    | 3.2  | 14.4 | 11.1 |
| s_21    | 3.0 | 4.8  | 4.2 | 4.0 | 4.6    | 1.8  | 4.9  | 6.0  |
| s_22    | -   | -    | 4.1 | -   | -      | -    | 3.0  | -    |
| s_23    | 6.4 | 0.8  | 5.2 | 3.7 | 8.3    | 1.5  | 7.0  | 4.6  |
| s_24    | 1.1 | -    | 2.6 | 2.1 | 1.1    | -    | 3.9  | 1.9  |
| s_25    | 2.0 | -    | 5.0 | 2.1 | 1.9    | -    | 3.4  | 2.9  |
| s_26    | 1.9 | 0.5  | 3.6 | 3.7 | 2.3    | -1.2 | 3.3  | 1.3  |

*sTA/iTA, superior/inferior temporal artery; sTV/iTV, superior/inferior temporal vein; FLS, flicker light stimulation; ES+FLS, electrical and flicker light stimulation*
