# Supplementary material for: Pulsed Electrical Stimulation of the Human Eye Enhances Retinal Vessel Reaction to Flickering Light
Source: PubMed Central journal article supplement (PMC6817672; doi:10.3389/fnhum.2019.00371), 2019-10-22
Supplement: Table_2.pdf [file Table_2.pdf]

**Supplementary Table S2.** Retinal vasodilation values of the individual subjects of the 800  $\mu$ A group after provocation with stimulus conditions FLS and ES+FLS.

| Subject | FLS  |      |     |      | ES+FLS |      |      |      |
|---------|------|------|-----|------|--------|------|------|------|
|         | sTA  | iTA  | sTV | iTV  | sTA    | iTA  | sTV  | iTV  |
| s_27    | 4.0  | -    | 6.5 | 3.5  | 4.7    | -    | 7.6  | 4.3  |
| s_28    | 2.6  | 3.2  | 3.3 | 2.5  | 3.8    | 5.0  | 4.2  | 2.7  |
| s_29    | 2.8  | -0.5 | 5.9 | 4.3  | 3.3    | 3.0  | 9.0  | 8.2  |
| s_30    | 4.7  | 5.9  | 6.3 | 4.3  | 9.9    | 6.8  | 7.7  | 4.7  |
| s_31    | 3.8  | 7.3  | 8.5 | 1.6  | 4.0    | 4.7  | 8.1  | 4.8  |
| s_32    | 1.1  | 2.4  | 5.2 | 3.3  | 1.8    | 4.2  | 5.1  | 4.9  |
| s_33    | 7.6  | 3.7  | 2.7 | 5.6  | 8.5    | 6.2  | 4.2  | 6.7  |
| s_34    | -    | 4.4  | 2.7 | 5.6  | -      | 11.2 | 6.1  | 5.4  |
| s_35    | 4.1  | 3.7  | -   | 12.4 | 5.2    | 5.4  | -    | 12.6 |
| s_36    | 3.7  | 4.4  | 5.3 | 8.8  | 4.0    | 4.5  | 6.2  | 6.7  |
| s_37    | -    | 4.4  | -   | -    | -      | 5.0  | -    | -    |
| s_38    | 5.8  | 5.1  | 6.0 | 7.1  | 6.7    | 5.9  | 8.0  | 8.2  |
| s_39    | 2.6  | -    | -   | -    | 5.8    | -    | -    | -    |
| s_40    | -    | 5.1  | 6.0 | 7.2  | -      | 6.9  | 8.3  | 7.5  |
| s_41    | -    | 4.6  | 5.0 | 6.3  | -      | 5.3  | 5.9  | 6.2  |
| s_42    | 4.9  | -    | 5.3 | 3.8  | 4.6    | -    | 10.2 | 6.5  |
| s_43    | -0.1 | -    | -   | 5.1  | 0.8    | -    | -    | 7.9  |
| s_44    | 2.1  | 1.9  | 1.5 | 4.3  | 6.2    | 0.0  | 6.0  | 7.2  |
| s_45    | 6.2  | 5.2  | 8.7 | 8.2  | 4.7    | 6.0  | 10.6 | 9.2  |
| s_46    | 2.9  | 0.5  | -   | -    | 2.1    | 1.0  | -    | -    |
| s_47    | 4.4  | 3.7  | 6.9 | 4.2  | 3.6    | 6.1  | 8.9  | 5.4  |
| s_48    | 6.5  | 4.6  | 6.3 | 7.2  | 8.2    | 4.0  | 9.0  | 7.7  |
| s_49    | 3.7  | 1.4  | 5.1 | 3.5  | 3.3    | 2.2  | 5.1  | 4.8  |
| s_50    | 2.1  | 2.7  | 5.0 | -    | 5.9    | 5.5  | 7.5  | -    |
| s_51    | 1.9  | -    | -   | -    | 3.3    | -    | -    | -    |
| s_52    | -    | 1.6  | 4.9 | 6.2  | -      | 0.7  | 5.9  | 5.4  |
| s_53    | -    | 3.8  | -   | 7.9  | -      | 2.5  | -    | 7.6  |

*sTA/iTA, superior/inferior temporal artery; sTV/iTV, superior/inferior temporal vein; FLS, flicker light stimulation; ES+FLS, electrical and flicker light stimulation*
