# Supplementary material for: Pulsed Electrical Stimulation of the Human Eye Enhances Retinal Vessel Reaction to Flickering Light
Source: PubMed Central journal article supplement (PMC6817672; doi:10.3389/fnhum.2019.00371), 2019-10-22
Supplement: Table_3.pdf [file Table_3.pdf]

**Supplementary Table S3.** Retinal vasodilation values of the individual subjects of the 1200  $\mu$ A group after provocation with stimulus conditions FLS and ES+FLS.

| Subject | FLS |      |     |     | ES+FLS |      |      |      |
|---------|-----|------|-----|-----|--------|------|------|------|
|         | sTA | iTA  | sTV | iTV | sTA    | iTA  | sTV  | iTV  |
| s_54    | 8.2 | 7.2  | 6.1 | 5.0 | 8.4    | 9.5  | 5.6  | 5.7  |
| s_55    | 3.2 | 8.3  | -   | 5.9 | 7.0    | 10.4 | -    | 8.1  |
| s_56    | 3.2 | 0.9  | 8.9 | 8.1 | 6.2    | 4.1  | 14.6 | 8.9  |
| s_57    | 5.2 | 9.5  | 6.9 | 6.2 | 5.1    | 8.4  | 8.1  | 11.0 |
| s_58    | 6.2 | 6.3  | 6.7 | -   | 7.2    | 8.3  | 6.9  | -    |
| s_59    | 8.9 | 10.1 | 6.5 | 4.2 | 7.6    | 12.7 | 5.6  | 5.3  |
| s_60    | 1.6 | 5.4  | 6.1 | 4.3 | 1.8    | 7.0  | 5.1  | 4.8  |
| s_61    | -   | 6.1  | 8.3 | -   | -      | 6.1  | 6.4  | -    |
| s_62    | -   | 6.5  | 2.2 | 6.1 | -      | 2.2  | 1.1  | 2.4  |
| s_63    | -   | 5.5  | 2.8 | -   | -      | 4.1  | 1.6  | -    |
| s_64    | -   | 0.0  | 2.5 | -   | -      | 1.2  | 4.7  | -    |
| s_65    | 2.6 | 1.5  | -   | -   | 4.1    | 4.1  | -    | -    |
| s_66    | 2.7 | -    | 3.5 | 3.5 | 0.7    | -    | 6.8  | 6.3  |
| s_67    | 1.6 | 3.5  | 5.9 | 4.2 | 3.5    | 5.4  | 8.7  | 4.7  |
| s_68    | -   | -    | -   | 4.4 | -      | -    | -    | 6.8  |
| s_69    | 5.5 | 2.4  | -   | 7.3 | 2.1    | 0.5  | -    | 6.4  |
| s_70    | 4.8 | 5.6  | 6.4 | 7.0 | 6.3    | 7.3  | 3.6  | 5.3  |
| s_71    | 1.8 | 4.3  | 5.7 | 4.9 | 1.3    | 3.1  | 5.6  | 5.1  |
| s_72    | 6.1 | 1.6  | 6.1 | 4.2 | 7.2    | 3.7  | 6.4  | 3.5  |
| s_73    | 4.3 | 5.2  | 2.0 | 2.1 | 4.2    | 3.7  | 2.9  | 1.4  |
| s_74    | 6.6 | 4.9  | 4.0 | 2.1 | 6.7    | 8.0  | 4.5  | 3.0  |
| s_75    | 7.1 | 8.8  | 7.0 | 4.4 | 7.2    | 9.9  | 8.0  | 5.3  |
| s_76    | 4.0 | -    | -   | -   | 5.2    | -    | -    | -    |
| s_77    | 2.5 | 1.1  | 3.5 | 3.5 | 2.3    | 0.5  | 6.7  | 4.0  |
| s_78    | -   | -    | 8.2 | -   | -      | -    | 9.9  | -    |
| s_79    | 2.4 | -    | 4.5 | 4.5 | 3.1    | -    | 3.8  | 5.1  |
| s_80    | 3.0 | 1.7  | 6.0 | 4.4 | 1.9    | 3.6  | 5.2  | 5.5  |

*sTA/iTA, superior/inferior temporal artery; sTV/iTV, superior/inferior temporal vein; FLS, flicker light stimulation; ES+FLS, electrical and flicker light stimulation*
